# Supplementary material
Source: publisher site journal article supplement (https://www.dovepress.com/article/468890)
Supplement: Supplementary file 1 [file get_supplementary_file.php]

Table S1 The concentration monitoring results of Polymyxin B

| **Parameters** | **All concentrations**  **n=191** | **Adult group**  **n=159** | **Children group**  **n=32** |
| --- | --- | --- | --- |
| **Cmin,** **μg/mL**, median (IQR) | 2.2 (1.4, 3.1) | 2.4 (1.8, 3.5) | 0.8 (0.6, 1.3) |
| ≥5.0, n (%) | 9 (4.7) | 8 (5.0) | 1 (3.1) |
| 4.0~4.9, n (%) | 22 (11.5) | 22 (13.8) | 0 |
| 3.0~3.9, n (%) | 18 (9.4) | 18 (11.3) | 0 |
| 2.0~2.9, n (%) | 59 (30.9) | 57 (35.8) | 2 (6.3) |
| 1.0~1.9, n (%) | 55 (28.8) | 44 (27.7) | 11 (34.4) |
| <1.0, n (%) | 28 (14.7) | 10 (6.3) | 18 (56.3) |
| **Cmin /MIC**, median (IQR) | 2.4 (1.5, 4.3) | 2.7 (1.8, 4.6) | 1.3 (0.7, 2.1) |
| ≥5.0, n (%) | 36 (18.8) | 35 (22.0) | 1 (3.1) |
| 3.0~4.9, n (%) | 36 (18.8) | 35 (22.0) | 1 (3.1) |
| 1.0~2.9, n (%) | 93 (48.7) | 76 (47.8) | 17 (53.1) |
| <1.0, n (%) | 26 (13.6) | 13 (8.2) | 13 (40.6) |
| **Cmax,** **μg/mL**, median (IQR) | 5.4 (4.1, 6.8) | 5.4 (4.3, 7.0) | 4.4 (3.4, 6.3) |
| ≥11.0, n (%) | 8 (4.2) | 7 (4.4) | 1 (3.1) |
| 9.0~10.9, n (%) | 10 (5.2) | 8 (5.0) | 2 (6.3) |
| 7.0~8.9, n (%) | 27 (14.1) | 25 (15.7) | 2 (6.3) |
| 5.0~6.9, n (%) | 60 (31.4) | 53 (33.3) | 7 (21.9) |
| 3.0~4.9, n (%) | 68 (35.6) | 54 (34.0) | 14 (43.8) |
| <3.0, n (%) | 18 (1.6) | 12 (7.5) | 6 (18.8) |
| **Cmax /MIC**, median (IQR) | 6.8 (4.33, 10.5) | 6.8 (4.3, 10.7) | 6.8 (4.5, 9.3) |
| ≥10.0, n (%) | 53 (27.7) | 46 (28.9) | 7 (21.9) |
| 7.0~9.9, n (%) | 41 (21.5) | 32 (20.1) | 9 (28.1) |
| 3.0~6.9, n (%) | 70 (36.6) | 56 (35.2) | 14 (43.8) |
| <3.0, n (%) | 27 (14.1) | 25 (15.7) | 12 (6.3) |
| **AUC24, mg· h/L**, median (IQR) | 85.8 (66.3, 112.5) | 91.8 (70.8, 119.6) | 55.8 (44.5, 77.9) |
| ＞100, n (%) | 68 (35.6) | 63 (39.6) | 5 (15.6) |
| 50~100, n (%) | 97 (50.8) | 84 (52.8) | 13 (40.6) |
| ＜50, n (%) | 26 (13.6) | 12 (7.5) | 14 (43.8) |
| **AUC /MIC**, median (IQR) | 104.2 (69.6,163.6) | 108.8 (71.0,171.2) | 85.8 (51.5,121.7) |
| >100, n (%) | 98 (51.3) | 86 (54.1) | 12 (37.5) |
| 51~100, n (%) | 63 (33.0) | 50 (31.4) | 13 (40.6) |
| 30~50, n (%) | 24 (12.6) | 18 (11.3) | 6 (18.8) |
| <30, n (%) | 6 (3.1) | 5 (3.1) | 1 (3.1) |

Notes:Children ≤ 14 years old.

**Abbreviations:** Cmin, Trough concentration; Cmax, Peak concentration; AUC, Area Under the concentration-time Curve; MIC, Minimal Inhibitory concentration.

Table S2 Analysis of factors affecting bacterial clearance during Polymyxin B treatment

| **Parameters** | **Bacterial clearance group（n=70）** | **Non-bacterial clearance group (n=60)** | **OR (95%CI)** | ***P* value** |
| --- | --- | --- | --- | --- |
| **Univariate analysis** |  |  |  |  |
| Age, years, n (%) |  |  |  | 0.074 |
| ＞80 | 9 (12.9) | 17 (28.3) | 1 | - |
| <18 | 18 (25.7) | 6 (10.0) | 1.03 (0.334-3.160) | 0.963 |
| 18~64 | 18 (25.7) | 14 (23.3) | 1.61 (0.548-4.746) | 0.385 |
| 65~80 | 25 (35.7) | 23 (38.3) | 0.48 (0.182-1.267) | 0.138 |
| Mechanical ventilation, n (%) | 44 (62.9) | 25 (41.6) | 2.37 (1.169-4.800) | **0.017** |
| Surgery operation, n (%) | 46 (65.7) | 24 (40.0) | 2.88 (1.41-5.87) | **0.004** |
| ICU, n (%) | 63 (90.0) | 51 (85.0) | 0.99 (0.966-1.011) | 0.316 |
| Test index before PMB treatment |  |  |  |  |
| PCT, ng/mL, median (IQR) | 1.6 (0.4, 9.8) | 0.9 (0.2, 2.5) | 1.01 (0.996-1.033) | 0.131 |
| SOFA, median (IQR) | 6.0 (4.0, 10.8) | 5.0 (2.8, 9.3) | 1.06 (0.983-1.139) | 0.132 |
| Infection type, n (%) |  |  |  |  |
| Bloodstream infection | 41 (58.6) | 11 (18.3) | 6.30 (2.806-14.137) | **0.000** |
| Lung infection | 36 (51.4) | 47 (78.3) | 0.31 (0.143-0.672) | **0.003** |
| Abdominal infection | 13 (18.6) | 7 (11.7) | 1.73 (0.640-4.657) | 0.280 |
| PMB therapeutic regimen |  |  |  |  |
| Loading dose, mg/kg, median (IQR) | 1.7 (1.4, 2.0) | 1.7 (1.4, 2.0) | 1.10 (0.458-2.626) | 0.837 |
| Maintenance dose, mg/kg/q12h, median (IQR) | 1.0 (0.8, 1.2) | 1.0 (0.8, 1.0) | 2.09 (0.530-8.251) | 0.293 |
| Daily dose, mg/kg, median (IQR) | 1.9 (1.5, 2.3) | 1.9 (1.6, 2.0) | 1.45 (0.706-2.974) | 0.313 |
| Accumulated dose, mg/kg, median (IQR) | 22.7 (14.2, 29.5) | 18.8 (10.7, 28.3) | 1.00 (0.980-1.011) | 0.549 |
| Treatment duration, days, median (IQR) | 13.5 (9.0, 15.0) | 11.5 (7.0, 20.3) | 0.99 (0.966-1.011) | 0.316 |
| PMB aerosol inhalation or intrathecal injection, n (%) | 18 (25.7) | 20 (33.3) | 0.94 (0.436-2.035) | 0.880 |
| TDM |  |  |  |  |
| Cmin /MIC | 2.3 (1.4, 4.3) | 2.3 (1.5, 4.5) | 1.05 (0.932-1.172) | 0.452 |
| Cmax /min | 6.2 (4.2, 10.3) | 6.4 (4.2, 9.6) | 1.04 (0.971-1.112) | 0.270 |
| AUC /MIC | 97.7 (65.5, 171.5) | 98.6(71.0, 159.4) | 1.00 (0.998-1.005) | 0.346 |
| Pathogenic bacteria species, n (%) |  |  |  |  |
| *CR Klebsiella Pneumoniae* | 36 (51.4) | 31 (51.7) | 0.99 (0.497-1.975) | 0.978 |
| *CR Acinetobacter baumannii* | 28 (40.0) | 34 (56.7) | 0.51 (0.253-1.026) | 0.059 |
| *CR Pseudomonas aeruginosa* | 11 (15.7) | 10 (16.7) | 0.93 (0.366-2.376) | 0.883 |
| MIC, μg/mL | 1.0 (0.5, 1.0) | 1.0 (0.5, 1.0) | 0.78 (0.463-1.314) | 0.351 |
| **Multivariate analysis** |  |  |  |  |
| Bloodstream infection |  |  | 5.58 (2.45-12.71) | **0.000** |
| Surgery operation |  |  | 2.29 (1.06-4.97) | **0.035** |

Notes: *P* values＜0.05 are in bold; Bacterial names are in italics.

**Abbreviations:** OR odds ratio; CI confidence interval; WBC, White Blood Cells; CRP, C-reactive protein; PCT, Procalcitonin; SOFA, Sequential Organ Failure Assessment; CRRT, continuous renal replacement therapy; ICU, intensive care unit; eGFR, estimated glomerular filtration rate; MIC, Minimal Inhibitory Concentration; *CR*, *Carbapenem-resistant*; Cmin, Trough concentration; Cmax, Peak concentration; AUC, Area Under the concentration-time Curve; MIC, Minimal Inhibitory concentration.

Tablet S3 Analysis of factors influencing skin pigmentation during Polymyxin B treatment

| **Parameters** | **OR** | **95%CI** | ***P* value** |
| --- | --- | --- | --- |
| **Univariate analysis** |  |  |  |
| Age, years, < 50 vs. ≥ 50 | 0.22 | 0.085-0.546 | **0.001** |
| Female | 0.69 | 0.327-1.436 | 0.316 |
| Cmin, μg/mL | 0.93 | 0.737-1.165 | 0.513 |
| Combined diabetes | 0.46 | 0.201-1.028 | 0.058 |
| PMB daily dose, mg/kg | 1.13 | 0.556-2.281 | 0.740 |
| PMB accumulated dose, mg/kg | 1.14 | 1.085-1.203 | **0.000** |
| PMB duration, day, ≤ 10 vs. >10 | 39.85 | 13.538-117.321 | **0.000** |
| **Multivariate analysis** |  |  |  |
| Age, years, < 50 vs. ≥ 50 | 0.16 | 0.042-0.642 | **0.009** |
| PMB duration, days, ≤ 10 vs. >10 | 44.79 | 13.724-146.162 | **0.000** |

Notes: *P* values＜0.05 are in bold;.

**Abbreviations:** OR odds ratio; CI confidence interval; Cmin, Trough concentration.
